# Supplementary material
Source: PubMed Central journal article supplement (PMC533048)
Supplement: 7600462s2.pdf [file 7600462s2.pdf]

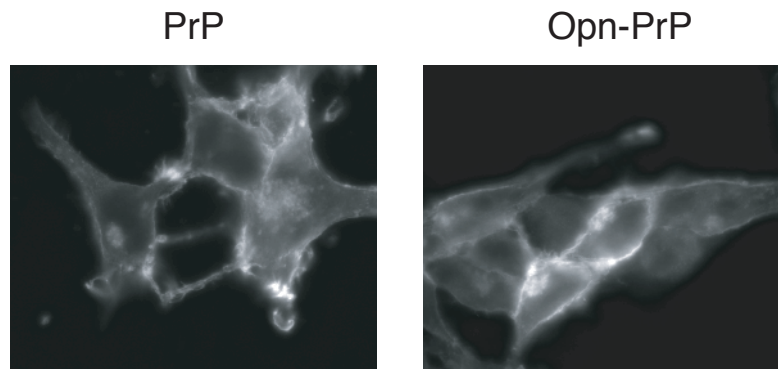

**Figure S2** - Analysis of PrP and Opn-PrP localization by indirect immunofluorescence.

N2a cells transfected with either PrP or Opn-PrP were fixed and stained with 3F4 anti-PrP monoclonal antibody. This antibody specifically recognizes the transfected hamster PrP, but not endogenous mouse PrP. Both PrP and Opn-PrP show the same localization pattern: predominantly cell surface staining, with a minor population in a peri-nuclear location. The identical staining pattern was also observed for PrI-PrP (data not shown). The peri-nuclear staining co-localizes partially with both Golgi and endosomal markers (data not shown), consistent with previous studies (Laine et al., 2001; Magalhaes et al., 2002).
