# Supplementary material
Source: PubMed Central journal article supplement (PMC533048)
Supplement: 7600462s8.pdf [file 7600462s8.pdf]

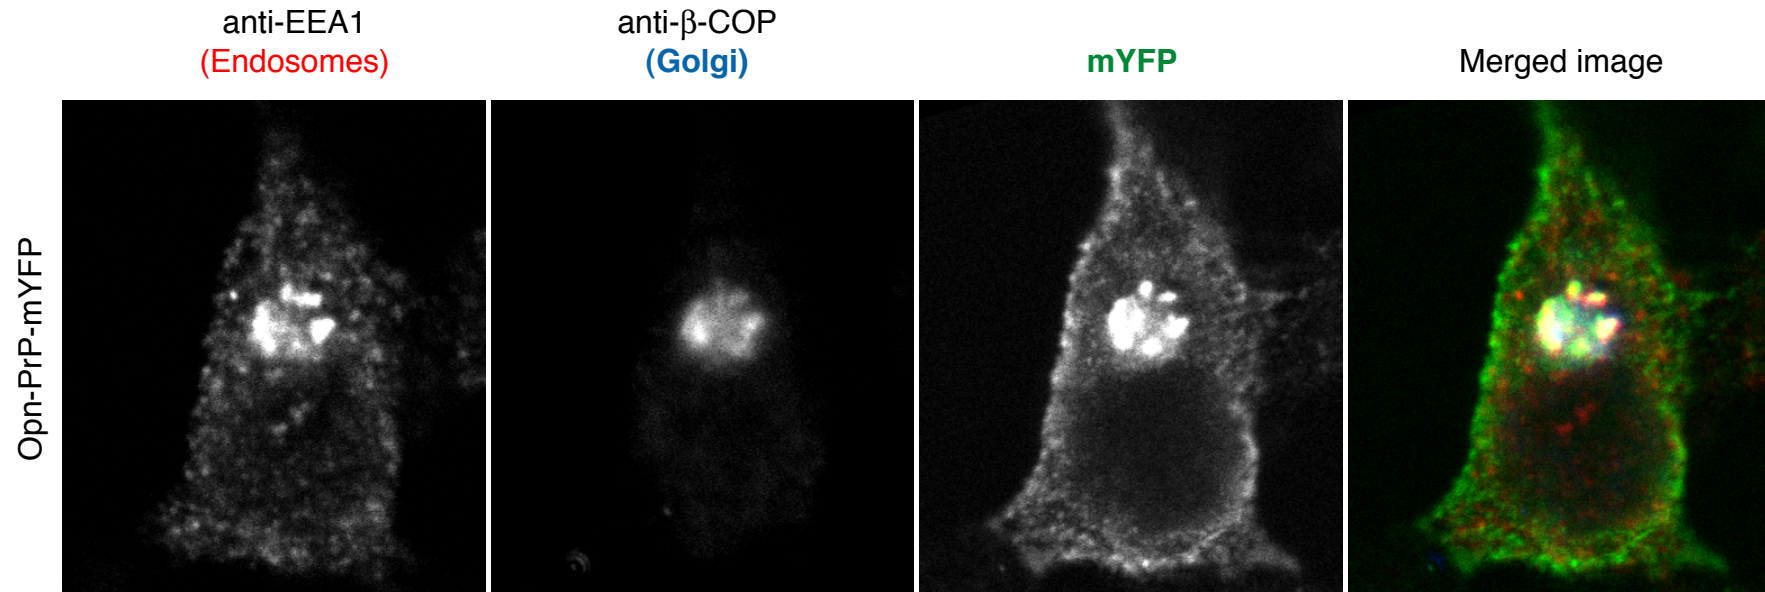

**Figure S8** - Localization of Opn-PrP-mYFP after proteasome inhibitor treatment.

Cells were transfected with Opn-PrP-mYFP and treated with 5  $\mu$ M MG132 for 4 hours prior to fixation and analysis by indirect immunofluorescence and confocal microscopy (exactly as in Fig. 5). Opn-PrP-mYFP was visualized directly, while endosomes and Golgi were visualized by staining with antibodies against EEA1 and  $\beta$ -COP, respectively. Shown are the individual channels and the merged image. Note that Opn-PrP-mYFP displays localization primarily at the cell surface and in perinuclear structures that co-localize partially with the Golgi, and partially with endosomal structures. This pattern is identical to that observed for Opn-PrP-mYFP or wtPrP-mYFP before proteasome inhibitor treatment (see Fig. 4A, 5A, and 5C). By contrast, it is markedly different than the pattern observed for wtPrP-mYFP after proteasome inhibitor treatment (see Fig. 4D, 5D and Supplementary Fig. S9).
