# Supplementary material
Source: PubMed Central journal article supplement (PMC533048)
Supplement: 7600462s10.pdf [file 7600462s10.pdf]

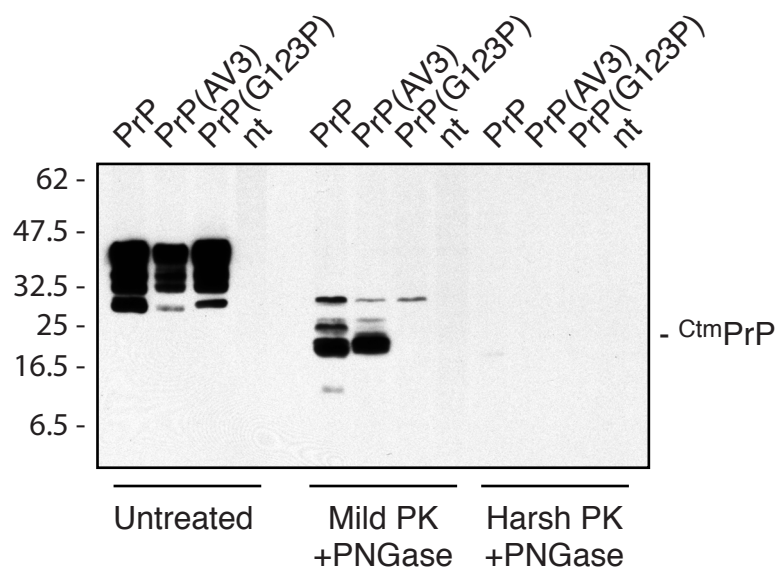

**Figure S10** - C<sup>tm</sup>PrP analysis of transmembrane domain mutants of PrP.

Shown is an overexposed blot of the experiment from Fig. 7A. This exposure illustrates the complete absence of C<sup>tm</sup>PrP for the PrP(G123P) mutant (i.e., no diagnostic 18 kD band upon mild PK digestion). Note that on this exposure, the increase in C<sup>tm</sup>PrP observed for the PrP(AV3) mutant (relative to wtPrP) is not readily appreciated as it is in the fainter exposure (Fig. 7A). The minor bands seen for all three constructs in the 'mild PK' lanes of this overexposed blot may represent the very small proportion of PrP that is incompletely solubilized (and hence, inaccessible to protease digestion) under these conditions.
